# Supplementary material
Source: PubMed Central journal article supplement (PMC11028128)
Supplement: 262_2018_2177_MOESM1_ESM.pdf [file 262_2018_2177_MOESM1_ESM.pdf]

# Supplementary Figure 1

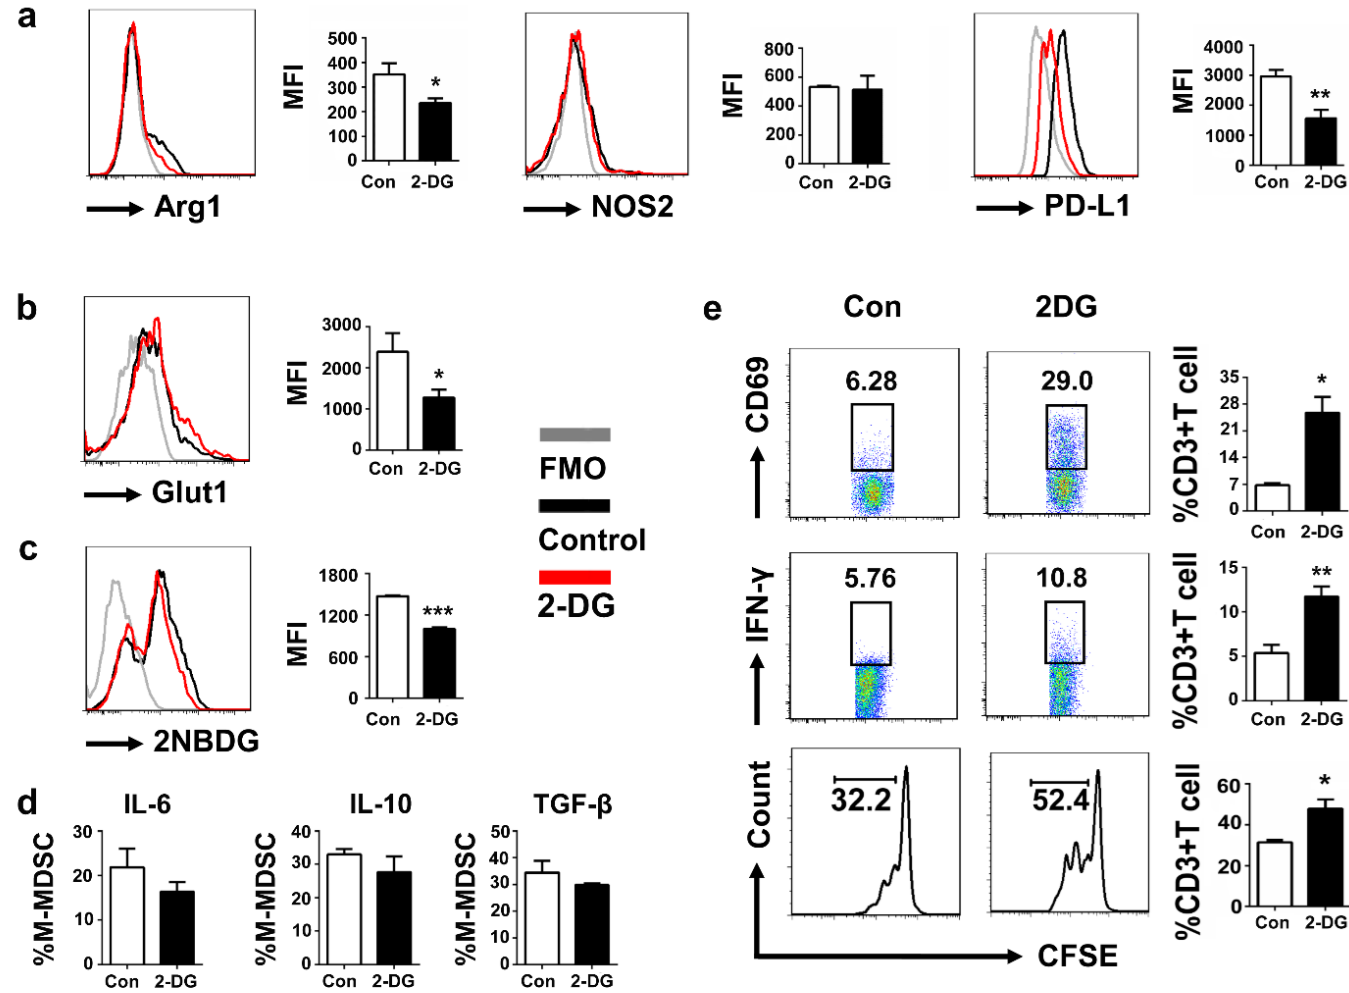

**Supplementary Figure.1 2-DG inhibition reduced the suppressive functions of tumor M-MDSC** (a) Tumor M-MDSC were isolated and pretreated with 10 $\mu$ g/mL 2-DG for 24h. Arg1, NOS2, PD-L1 and (b) Glut1 expression of tumor M-MDSC from control group and 2-DG pretreated group were detected by flow cytometry. (c) Tumor bearing mice were injected 50 $\mu$ g 2-DG per mouse by intraperitoneal route and 24h later injected 200 $\mu$ g 2NBDG per mouse by intravenous route. 2NBDG incorporation of tumor M-MDSC from PBS control group and 2-DG pretreated group were detected by flow cytometry 4h later. (d) Tumor M-MDSC were isolated and pretreated with 10 $\mu$ g/mL 2-DG for 24h. And then IL-6, IL-10 and TGF- $\beta$  percentage of tumor M-MDSC from PBS control group and 2-DG pretreated group were measured by flow cytometry. (e) CD3+ T cells were isolated by MACS and cocultured with 2-DG pretreated or PBS pretreated tumor M-MDSC respectively in a 48 well plate precoated with anti-CD3 (5  $\mu$ g/mL) antibody and soluble anti-CD28 (2  $\mu$ g/mL) antibody. CD69 and IFN- $\gamma$  expression of CD3+T cells were measured 24h later and proliferation of T cells labeled with CFSE was measured 72h later (M-MDSC: T ratio = 1:4). Data are pooled from three independent experiments and expressed as mean  $\pm$  SEM. \*P < 0.05; \*\*P < 0.01; \*\*\*P < 0.001.

## Supplementary Figure 2

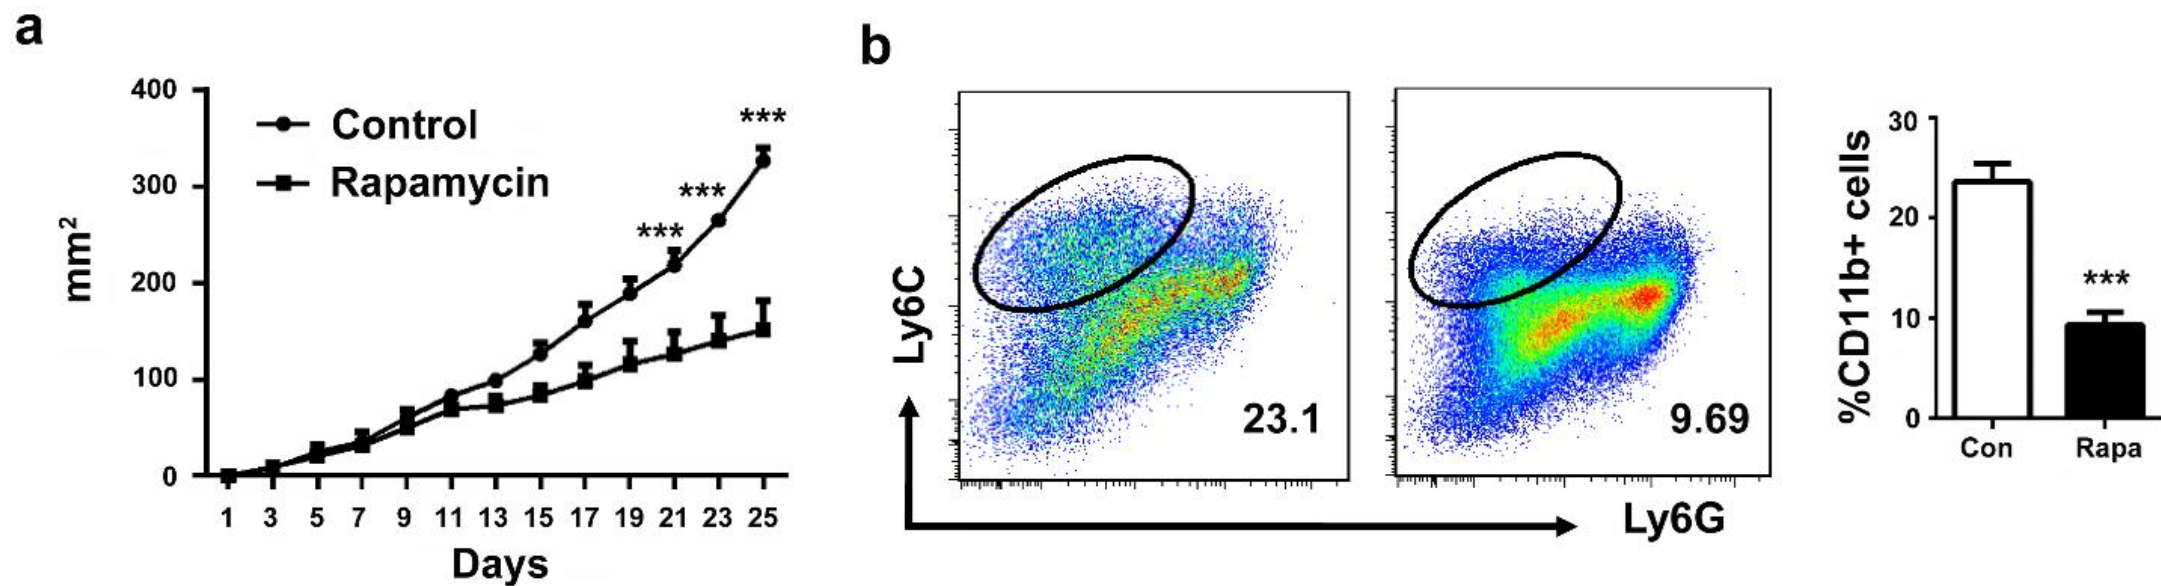

**Supplementary Figure.2 Rapamycin reduced the tumor growth and the percentage of tumor M-MDSC.** C57BL/6 mice were implanted with  $1 \times 10^6$  3LL tumor cells and treated with  $10 \mu\text{g}$  rapamycin (solved in 2% DMSO+30% PEG 300+5% Tween 80+ddH<sub>2</sub>O) in situ every 2 days for 5 times from day 3 when the tumors were palpable. Tumor areas were monitored every 2 days. Mice were sacrificed 25days after tumor inoculation. Tumor M-MDSCs were detected by flow cytometry. Data are pooled from three independent experiments and expressed as mean  $\pm$  SEM. \*P < 0.05; \*\*P < 0.01; \*\*\*P < 0.001.

### Supplementary Figure 3

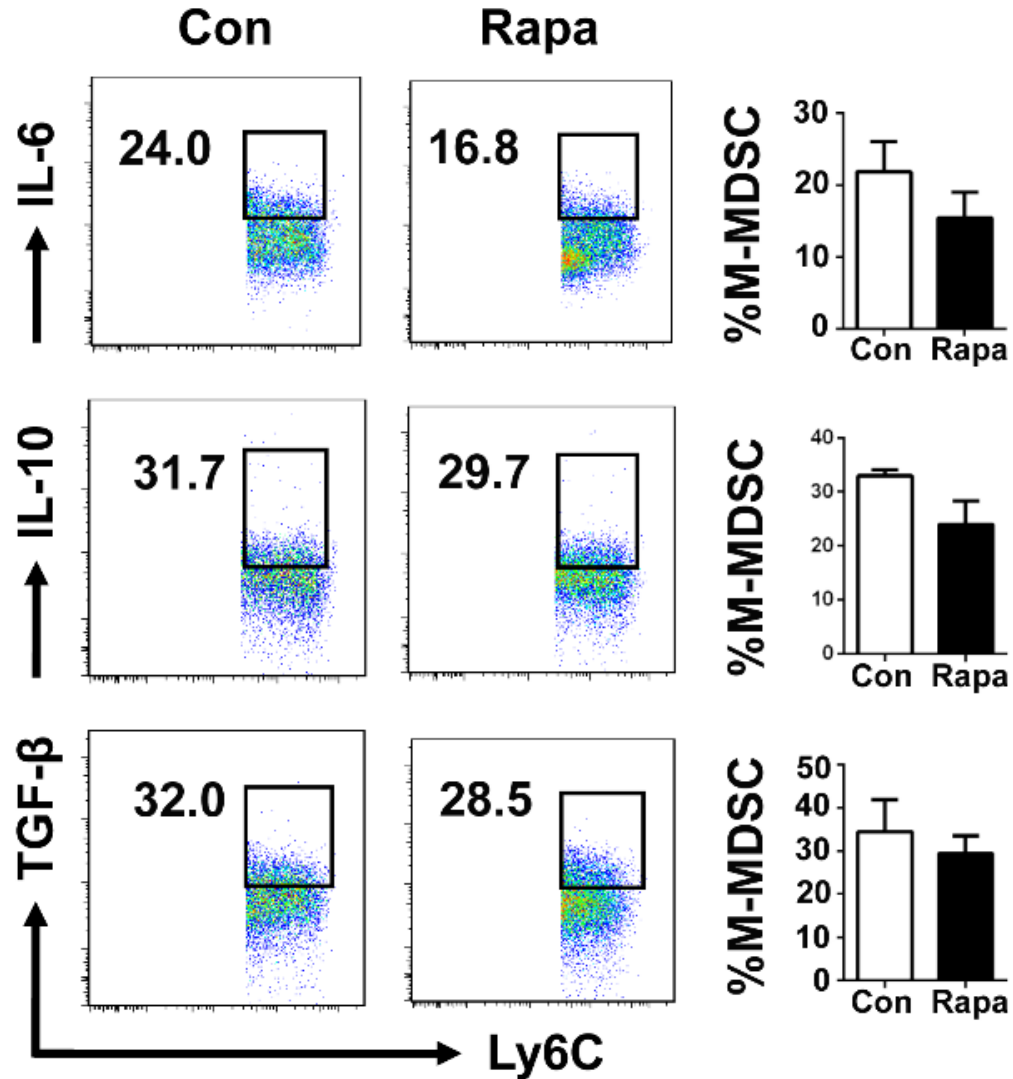

**Supplementary Figure.3 Rapamycin effects on the cytokines expression of tumor M-MDSC.** C57BL/6 mice were implanted with  $1 \times 10^6$  3LL tumor cells and treated with  $10 \mu\text{g}$  rapamycin (solved in 2% DMSO+30% PEG 300+5% Tween 80+ddH<sub>2</sub>O) in situ every 2 days for 5 times from day 3 when the tumors were palpable. IL-6, IL-10 and TGF- $\beta$  expression of tumor M-MDSC from control group and rapamycin treated group were detected by flow cytometry. Data are pooled from three independent experiments and expressed as mean  $\pm$  SEM. \*P < 0.05; \*\*P < 0.01; \*\*\*P < 0.001.

## Supplementary Table 1

|          |                                                       |
|----------|-------------------------------------------------------|
| F6P      | fructose-6-phosphate                                  |
| FBP      | fructose 1,6-bisphosphate                             |
| GAP/DHAP | glyceraldehyde 3-phosphate/dihydroxyacetone phosphate |
| 2,3GP    | 2,3-bisphosphoglycerate                               |
| 3PG      | 3-Phosphoglyceric acid                                |
| PEP      | phosphoenolpyruvate                                   |
| PYR      | pyruvate                                              |
| LAC      | lactate                                               |
| E4P      | Erythrose 4-phosphate                                 |
| D5P      | D-Xylulose 5-phosphate                                |
| S7P      | sedoheptulose-7-phosphate                             |
| CIT      | citrate                                               |
| AKG      | alpha-ketoglutarate                                   |
| SUC      | succinate                                             |
| FUM      | fumarate                                              |
| MAL      | malate                                                |
| NADPH    | nicotinamide adenine dinucleotide phosphate, reduced  |
| NADP     | nicotinamide adenine dinucleotide phosphate           |
| NADH     | nicotinamide adenine dinucleotide, reduced            |
| NAD      | nicotinamide adenine dinucleotide                     |
| ATP      | adenosine triphosphate                                |
| ADP      | adenosine diphosphate                                 |
| GSH      | Glutathione                                           |
| GSSG     | Glutathione disulfide                                 |
| ASP      | aspartate                                             |
| Glu      | glutamic acid                                         |
| Gln      | glutamine                                             |
| Cys      | cysteine                                              |
| Gly      | glycerin                                              |
| IMP      | inosine monophosphate                                 |

## Supplementary Table 2

|       |           |                          |
|-------|-----------|--------------------------|
| Arg1  | forward : | CTCCAAGCCAAAGTCCTTAGAG   |
|       | reverse : | AGGAGCTGTCATTAGGGACATC   |
| NOS2  | forward : | GTTCTCAGCCCAACAATAACAAGA |
|       | reverse : | GTGGACGGGTTCGATGTCAC     |
| PD-L1 | forward : | GCTCCAAAGGACTTGTACGTG    |
|       | reverse : | TGATCTGAAGGGCAGCATTTC    |
| Glut1 | forward : | CAGTTCGGCTATAAACTGGTG    |
|       | reverse : | GCCCCGACAGAGAAGATG       |
| Hk2   | forward : | ATGATCGCCTGCTTATTCACG    |
|       | reverse : | CGCCTAGAAATCTCCAGAAGGG   |
| Gpi   | forward : | TCAAGCTGCGCGAACTTTTTG    |
|       | reverse : | GGTTCTTGGAGTAGTCCACCAG   |
| Tpi   | forward : | CCAGGAAGTTCTTCGTTGGGG    |
|       | reverse : | CAAAGTCGATGTAAGCGGTGG    |
| Eno1  | forward : | TGCGTCCACTGGCATCTAC      |
|       | reverse : | CAGAGCAGGCGCAATAGTTTTA   |
| Pkm2  | forward : | CGCCTGGACATTGACTCTG      |
|       | reverse : | GAAATTCAGCCGAGCCACATT    |
| Ldha  | forward : | TGTCTCCAGCAAAGACTACTGT   |
|       | reverse : | GACTGTACTTGACAATGTTGGGA  |
| Mct4  | forward : | TCACGGGTTTCTCCTACGC      |
|       | reverse : | GCCAAAGCGGTTACACAC       |
